# Supplementary material for: Advancing in Schaaf-Yang syndrome pathophysiology: from bedside to subcellular analyses of truncated MAGEL2
Source: PubMed Central journal article supplement — J Med Genet. 2022 Sep 7;60(4):406–15. doi: 10.1136/jmg-2022-108690 (PMC10086475; doi:10.1136/jmg-2022-108690), 2022-09-07
Supplement: jmg-2022-108690supp003.pdf [file jmg-2022-108690supp003.pdf]

# **Supplementary Table 3: Propuesta de protocolo de estudio y seguimiento para el Síndrome de Schaaf-Yang**

**(Spanish version)**

| Periodo perinatal                   |                                                                                                                                                                                                                                                                                                                                                                                                  |                                                                                                                                                                                                                                                                                                                    |
|-------------------------------------|--------------------------------------------------------------------------------------------------------------------------------------------------------------------------------------------------------------------------------------------------------------------------------------------------------------------------------------------------------------------------------------------------|--------------------------------------------------------------------------------------------------------------------------------------------------------------------------------------------------------------------------------------------------------------------------------------------------------------------|
|                                     | Descripción                                                                                                                                                                                                                                                                                                                                                                                      | Problemas especiales y su manejo                                                                                                                                                                                                                                                                                   |
| <b>Dificultades respiratorias</b>   | <p>Con frecuencia precisan UCI Neonatal, principalmente debido a la falta de reactividad neonatal. La necesidad de asistencia ventilatoria durante el período perinatal varía desde la oxigenoterapia hasta la ventilación mecánica invasiva, desde unas horas de apoyo hasta algunos meses. También se han notificado estridor laríngeo, glosoptosis, traqueomalacia e hipoplasia pulmonar.</p> | <p>UCIN. Ventilación mecánica. Evaluación por <b>otorrinolaringólogos y neumólogos</b> para descartar anomalías anatómicas. Soporte respiratorio desde <b>oxigenoterapia</b> hasta <b>ventilación mecánica invasiva</b> y necesidad de traqueostomía.</p>                                                          |
| <b>Dificultades de alimentación</b> | <p>Son muy frecuentes las dificultades para alimentarse con frecuentes episodios de atragantamiento o succión ineficaz. La hipotonía, el letargo, la disfagia y un paladar alto, todos juntos pueden dificultar la nutrición por boca.</p>                                                                                                                                                       | <p>Se necesitan <b>nutricionistas y especialistas en disfagia</b>.<br/>Es importante realizar una evaluación anatómica para descartar <b>malformaciones</b>. Puede ser necesaria una intervención nutricional de apoyo, desde una sonda nasogástrica hasta una gastrostomía permanente o nutrición parenteral.</p> |

Supplementary Table 3: Propuesta de protocolo de estudio y seguimiento para el Síndrome de Schaaf-Yang

| Periodo perinatal           |                                                                                                                                                                                                                                                                                                 |                                                                                                                                                                                                                                                                                                |
|-----------------------------|-------------------------------------------------------------------------------------------------------------------------------------------------------------------------------------------------------------------------------------------------------------------------------------------------|------------------------------------------------------------------------------------------------------------------------------------------------------------------------------------------------------------------------------------------------------------------------------------------------|
|                             | Descripción                                                                                                                                                                                                                                                                                     | Problemas especiales y su manejo                                                                                                                                                                                                                                                               |
| <b>Contracturas</b>         | El pie zambo, la artrogriposis, las contracturas y otras restricciones de movimiento articular están presentes con frecuencia al nacer.<br>La hipocinesia fetal puede provocar una artrogriposis grave.                                                                                         | La intervención temprana con medidas ortopédicas puede resultar esencial para obtener un mejor pronóstico.<br>Es importante remitir a especialistas en <b>rehabilitación y ortopedia infantil</b> .                                                                                            |
|                             | Se han detectado varias alteraciones endocrinológicas durante el período perinatal, como la diabetes insípida, hiponatremia, deficiencia de hormona del crecimiento (GH), hipoglucemia e hipocalcemia (ver sección de Endocrinología).                                                          | Controlar los niveles de <b>glucosa</b> en sangre durante el período perinatal.<br>Las pruebas de laboratorio a esta edad deben incluir un análisis exhaustivo de <b>iones, glucosa y hormonas</b> para descartar alteraciones prevalentes.<br>Consultar con el <b>endocrinólogo</b> infantil. |
| <b>Problemas hormonales</b> | En la época perinatal se recomienda la evaluación por un neurólogo infantil y un genetista/ dismorfólogo. Se recomienda un examen físico detallado y un protocolo estandarizado para descartar malformaciones orgánicas que incluyen ecocardiograma, ecografía abdominal, ecografía craneal.... |                                                                                                                                                                                                                                                                                                |

Supplementary Table 3: Propuesta de protocolo de estudio y seguimiento para el Síndrome de Schaaf-Yang

| Infancia y Adolescencia   |                                                                                                              |                                                                                                                                                                                                                                                                                                                                                                                                                                                                                                                                                                                                                                                                                                                                                                                                                                                                                                                                                                                                                                                                                                                                                                                                                                                                 |
|---------------------------|--------------------------------------------------------------------------------------------------------------|-----------------------------------------------------------------------------------------------------------------------------------------------------------------------------------------------------------------------------------------------------------------------------------------------------------------------------------------------------------------------------------------------------------------------------------------------------------------------------------------------------------------------------------------------------------------------------------------------------------------------------------------------------------------------------------------------------------------------------------------------------------------------------------------------------------------------------------------------------------------------------------------------------------------------------------------------------------------------------------------------------------------------------------------------------------------------------------------------------------------------------------------------------------------------------------------------------------------------------------------------------------------|
| ESPECIALIDAD              | SEGUIMIENTO Y ESTUDIOS                                                                                       | CUIDADOS ESPECÍFICOS Y ESTUDIOS RECOMENDADOS                                                                                                                                                                                                                                                                                                                                                                                                                                                                                                                                                                                                                                                                                                                                                                                                                                                                                                                                                                                                                                                                                                                                                                                                                    |
| <b>Endocrinología (E)</b> | <p>Cada 6 meses/<br/>Exploración física<br/>Valorar:<br/>Laboratorio<br/>Ecografía<br/>Neuroimagen (RMc)</p> | <p>E1 <b>Fallo de medro</b> durante la infancia y la niñez, pero también <b>sobrepeso</b> temprano, obesidad e hiperfagia que comienzan después de la infancia. Puede ser necesaria una intervención dietética.</p> <p>E2 <b>Estatura baja</b> (de -1,5 DE a -5 DE), a veces necesita GH (considerar la apnea obstructiva cuando se prescribe GH)</p> <p>E3 Se ha descrito <b>diabetes insípida</b> que cursa con poliuria, densidad urinaria baja, hipostenuria e hipernatremia. Terapia hormonal sustitutiva.</p> <p>E4 Se ha descrito <b>panhipopituitarismo</b> causado por hipoplasia de la glándula pituitaria, pero también con resonancia magnética normal. Es necesario controlar la función tiroidea, somatomedina C, GH, hormonas suprarrenales, testosterona, LH y FSH. Se ha detectado hiperprolactinemia. Puede ser necesario un tratamiento con hormonas, que incluyen GH, levotiroxina e hidrocortisona. Terapia hormonal sustitutiva. Adolescencia → estrógenos.</p> <p>E5 <b>Hipoglicemia</b>. Garantizar la ingesta y mantenimiento de glucosa. Descartar hiperinsulinemia.</p> <p>E6 Inestabilidad de <b>temperatura</b>. Medidas de apoyo.</p> <p>E7 Genitales hipoplásicos, micropene y criptorquidia. Valorar testosterona, cirugía.</p> |

Supplementary Table 3: Propuesta de protocolo de estudio y seguimiento para el Síndrome de Schaaf-Yang

| Infancia y Adolescencia            |                                                                                                                                                                |                                                                                                                                                                                                                                                                                                                                                                                                                                                                                                                                                                                                                                                                                                                                                                                                                                                        |
|------------------------------------|----------------------------------------------------------------------------------------------------------------------------------------------------------------|--------------------------------------------------------------------------------------------------------------------------------------------------------------------------------------------------------------------------------------------------------------------------------------------------------------------------------------------------------------------------------------------------------------------------------------------------------------------------------------------------------------------------------------------------------------------------------------------------------------------------------------------------------------------------------------------------------------------------------------------------------------------------------------------------------------------------------------------------------|
| ESPECIALIDAD                       | SEGUIMIENTO Y ESTUDIOS                                                                                                                                         | CUIDADOS ESPECÍFICOS Y ESTUDIOS RECOMENDADOS                                                                                                                                                                                                                                                                                                                                                                                                                                                                                                                                                                                                                                                                                                                                                                                                           |
| <b>Gastroenterología (G)</b>       | <p>Cada 6 meses/<br/>Exploración física<br/>Observación de la alimentación<br/>Valorar:<br/>pHmetría<br/>Videofluoroscopia<br/>Imagen (Rx)<br/>Laboratorio</p> | <p>G1 Los problemas de <b>alimentación</b> son casi constantes. Las dificultades iniciales de alimentación se deben a disfagia, aspiración respiratoria recurrente y, en ocasiones, se requiere sonda nasogástrica y gastrostomía.</p> <p>G2 También son frecuentes el <b>estreñimiento</b> crónico de aparición temprana y el <b>reflujo gastroesofágico</b>.</p> <p>G3 Complicaciones informadas con poca frecuencia: pseudoobstrucción intestinal, insuficiencia velofaríngea, esofagitis eosinofílica y alergias alimentarias.</p>                                                                                                                                                                                                                                                                                                                 |
| <b>Muscular y esquelético (MS)</b> | <p>Cada 12 meses/<br/>Exploración física<br/>Valorar:<br/>Imagen (Rx)<br/>Electromiograma y<br/>Conducción nerviosa</p>                                        | <p>MS1 El tono muscular anormal es muy frecuente, sobre todo la hipotonía.</p> <p>MS2 La <b>artrogriposis</b> es muy frecuente: contracturas, acortamiento de extremidades, codos, rodillas, caderas. Camptodactilia, clinodactilia, braquidactilia de los dedos, pulgares en aducción.</p> <p>MS3 Se han descrito repetidamente los <b>pies zambos y equinovaros</b>.</p> <p>MS4 <b>Escoliosis</b>, cifosis, lordosis y tórax asimétrico. Es posible que se necesiten programas de rehabilitación temprana y ortesis externa. Se recomienda el control periódico de rayos X de la cadera en los niños que no pueden caminar y de la columna en total. Cirugía cuando sea necesario.</p> <p>MS5 Con menor frecuencia: acortamiento mesomélico y rizomélico de las extremidades, displasia de cadera y atrofia muscular distal de las extremidades.</p> |

Supplementary Table 3: Propuesta de protocolo de estudio y seguimiento para el Síndrome de Schaaf-Yang

| Infancia y Adolescencia                                           |                                                                                                                                                           |                                                                                                                                                                                                                                                                                                                                                                                                                                                                                                                                                                                                                                                                                                                                                                                                                                                                                                                                                                                                                                                                                                                                                                                                                                                                                                                                                                                                                           |
|-------------------------------------------------------------------|-----------------------------------------------------------------------------------------------------------------------------------------------------------|---------------------------------------------------------------------------------------------------------------------------------------------------------------------------------------------------------------------------------------------------------------------------------------------------------------------------------------------------------------------------------------------------------------------------------------------------------------------------------------------------------------------------------------------------------------------------------------------------------------------------------------------------------------------------------------------------------------------------------------------------------------------------------------------------------------------------------------------------------------------------------------------------------------------------------------------------------------------------------------------------------------------------------------------------------------------------------------------------------------------------------------------------------------------------------------------------------------------------------------------------------------------------------------------------------------------------------------------------------------------------------------------------------------------------|
| ESPECIALIDAD                                                      | SEGUIMIENTO Y ESTUDIOS                                                                                                                                    | CUIDADOS ESPECÍFICOS Y ESTUDIOS RECOMENDADOS                                                                                                                                                                                                                                                                                                                                                                                                                                                                                                                                                                                                                                                                                                                                                                                                                                                                                                                                                                                                                                                                                                                                                                                                                                                                                                                                                                              |
| <b>Problemas de neurodesarrollo y desarrollo intelectual (ND)</b> | <p>Cada 6-12 meses</p> <p>Exploración física</p> <p>Valorar:<br/>Escalas y evaluaciones del desarrollo sobre el paciente o completadas por los padres</p> | <p>ND1 El tono muscular anormal y la <b>artrogriposis</b> son muy frecuentes. La hipotonía es la más prevalente.</p> <p>ND2 El desarrollo de la <b>motricidad gruesa</b> puede verse gravemente afectado por el retraso en la adquisición del control de la cabeza, la sedestación y la marcha (no logrado por muchos pacientes).</p> <p>ND3 El desarrollo de la <b>motricidad fina</b> también es anormal debido a anomalías motoras, artrogriposis y camptodactilia.</p> <p>El uso propositivo de las manos, que se basa en la cognición y las habilidades sociales, puede verse alterado. Los programas de rehabilitación, estimulación temprana y, posteriormente, los programas de terapia ocupacional son fundamentales.</p> <p>ND4 Las <b>habilidades sociales</b> y la comunicación suelen verse gravemente afectadas. Solo algunos pacientes pueden desarrollar un lenguaje escaso.</p> <p>ND5 Los <b>rasgos de TEA</b> y las <b>alteraciones del comportamiento</b> son muy frecuentes. Esto puede interferir con las habilidades de comunicación. Se recomienda la evaluación de los terapeutas del habla. Las alternativas a la comunicación oral, como pictogramas o dispositivos electrónicos, pueden ayudar. La psicoterapia puede ser necesaria para los pacientes con TEA, para tratar no solo la esfera comunicativa sino también la rigidez, las conductas reiterativas, la hipersensorialidad,...</p> |

Supplementary Table 3: Propuesta de protocolo de estudio y seguimiento para el Síndrome de Schaaf-Yang

| Infancia y Adolescencia        |                                                                                               |                                                                                                                                                                                                                                                                                                                                                                                                   |
|--------------------------------|-----------------------------------------------------------------------------------------------|---------------------------------------------------------------------------------------------------------------------------------------------------------------------------------------------------------------------------------------------------------------------------------------------------------------------------------------------------------------------------------------------------|
| ESPECIALIDAD                   | SEGUIMIENTO Y ESTUDIOS                                                                        | CUIDADOS ESPECÍFICOS Y ESTUDIOS RECOMENDADOS                                                                                                                                                                                                                                                                                                                                                      |
| <b>Epilepsia (E)</b>           | Cada 12 meses<br><br>Entrevista clínica<br>Valorar:<br>EEG                                    | E1 Se han notificado convulsiones febriles.<br>E2 Epilepsia en menos del 50% de los pacientes, diferente tipología (parcial, generalizada), diferentes FAEs utilizados con éxito.                                                                                                                                                                                                                 |
| <b>Neuroimagen (NI)</b>        | En el momento diagnóstico.<br><br>Posteriormente, valorar si aparecen nuevos síntomas:<br>MRI | NI1 Mielinización retrasada, agrandamiento ventricular, anomalías del cuerpo caloso (adelgazamiento, displasia o agenesia).<br>NI2 Con frecuencia se informa de glándula pituitaria normal o hipoplásica.<br>NI3 Raramente descrito: atrofia cerebral global, aumento de la señal T2 en el núcleo caudado o en el putamen, globo pálido, vermis hipoplásico, hemorragias cerebelosas puntiformes. |
| <b>Problemas de sueño (SD)</b> | Cada 12 meses<br><br>Valorar:<br>Cuestionarios de sueño<br>Polisomnografía (PSG)              | SD1 Se ha informado de apnea central y / o apnea obstructiva que pueden empeorar los problemas cognitivos y de comportamiento, así como ser la causa de muerte prematura.<br>Se recomienda PSG periódica.                                                                                                                                                                                         |

Supplementary Table 3: Propuesta de protocolo de estudio y seguimiento para el Síndrome de Schaaf-Yang

| Infancia y Adolescencia |                                                                                                                       |                                                                                                                                                                                                                                                                                                                                                                                                                                                                                                               |
|-------------------------|-----------------------------------------------------------------------------------------------------------------------|---------------------------------------------------------------------------------------------------------------------------------------------------------------------------------------------------------------------------------------------------------------------------------------------------------------------------------------------------------------------------------------------------------------------------------------------------------------------------------------------------------------|
| ESPECIALIDAD            | SEGUIMIENTO Y ESTUDIOS                                                                                                | CUIDADOS ESPECÍFICOS Y ESTUDIOS RECOMENDADOS                                                                                                                                                                                                                                                                                                                                                                                                                                                                  |
| <b>Infecciones (I)</b>  | Cada 12 meses<br><br>Valorar:<br>Laboratorio<br>Estudios de imagen pulmonars                                          | I1 Se han notificado <b>infecciones respiratorias recurrentes</b> en los pacientes que necesitan asistencia respiratoria y en los que no la tienen, así como enfermedad pulmonar crónica debida a bronconeumonía repetida o aspiraciones recurrentes. Es posible que se requieran estudios de imágenes para verificar el parénquima pulmonar y descartar malformaciones. Rara vez son necesarios estudios invasivos.<br><br>I2 No se informa de una predisposición a infecciones en otros órganos o sistemas. |
| <b>Cardiología (C)</b>  | Al diagnóstico y si se desarrollan nuevos síntomas<br><br>Exploración física<br>Valorar:<br>ECG<br>Ecocardiografía    | C1 Los <b>defectos septales (CSA)</b> se han informado como las anomalías cardíacas estructurales más frecuentes, que en ocasiones se resuelven espontáneamente.<br><br>C2 Se ha descrito bradicardia en un bebé de 1 mes.                                                                                                                                                                                                                                                                                    |
| <b>Oftalmología (O)</b> | Cada 12 meses<br><br>Exploración física<br>Valorar:<br>Valoración de la agudeza<br>Fondo de ojo<br>Técnicas de imagen | O1 Se han descrito <b>estrabismo y nistagmo</b> , como trastornos oculomotores.<br><br>O2 Se han descrito defectos de refracción.<br><br>O3 Hipoplasia o atrofia del nervio óptico.<br><br>O4 La vista es normalmente difícil de evaluar en pacientes con SYS. Se requieren oftalmólogos pediátricos. Se ha descrito falta de seguimiento con los ojos, probablemente los rasgos de TEA subyacen a este síntoma.<br><br>O5 Raras: Xeroftalmia, causada por dormir con los ojos abiertos.                      |

Supplementary Table 3: Propuesta de protocolo de estudio y seguimiento para el Síndrome de Schaaf-Yang
