# Supplementary material for: Advancing in Schaaf-Yang syndrome pathophysiology: from bedside to subcellular analyses of truncated MAGEL2
Source: PubMed Central journal article supplement — J Med Genet. 2022 Sep 7;60(4):406–15. doi: 10.1136/jmg-2022-108690 (PMC10086475; doi:10.1136/jmg-2022-108690), 2022-09-07
Supplement: jmg-2022-108690supp006.pdf [file jmg-2022-108690supp006.pdf]

**Antecedentes:** el síndrome de Schaaf-Yang (SYS) es causado por mutaciones truncantes en *MAGEL2*, localizado en la región de Prader-Willi (15q11-q13), con un fenotipo observado que se solapa parcialmente al del síndrome de Prader-Willi. *MAGEL2* desempeña un papel en el transporte retrógrado y la regulación del reciclaje de proteínas. Nuestro objetivo es contribuir a la caracterización de la fisiopatología del SYS a nivel clínico, genético y molecular.

**Métodos:** Hemos realizado una extensa revisión fenotípica y molecular de pacientes con SYS previamente publicados. Hemos analizado los niveles de secreción del péptido  $\beta$ -amiloide 1-40 ( $A\beta_{1-40}$ ) y hemos realizado perfiles metabolómicos y transcriptómicos específicos en fibroblastos de pacientes con SYS ( $n = 7$ ) en comparación con los controles ( $n = 11$ ). También transfectamos líneas celulares con vectores que codifican *MAGEL2* de tipo salvaje (WT) o mutado para evaluar la estabilidad y la localización subcelular de la proteína truncada.

**Resultados:** Los estudios funcionales muestran niveles significativamente reducidos de  $A\beta_{1-40}$  secretado y glutamina intracelular en fibroblastos SYS en comparación con los de controles sanos. También identificamos 132 genes expresados diferencialmente, incluidos ncRNA como HOTAIR, muchos de ellos relacionados con procesos de desarrollo y mecanismos mitóticos. La forma truncada de *MAGEL2* mostró una estabilidad similar a la normal, pero se trasladó significativamente al núcleo, en comparación con una distribución principalmente citoplásmica de la proteína *MAGEL2* completa. Basados en conocimientos actualizados, ofrecemos pautas para el manejo clínico de los pacientes con SYS.

**Conclusión:** La proteína *MAGEL2* truncada estudiada es estable y se localiza principalmente en el núcleo, donde podría ejercer un efecto patogénico neomórfico. Los niveles de secreción de  $A\beta_{1-40}$  y los niveles de ARNm de HOTAIR podrían ser biomarcadores prometedores para SYS. Nuestros hallazgos pueden mejorar la comprensión de SYS y su manejo clínico.
